# Supplementary material for: Entangled Zn(ii)/Cd(ii) coordination complexes based on a flexible bis(methylbenzimidazole) ligand and different dicarboxylates
Source: Royal Society of Chemistry journal article supplement (doi:10.1039/c3ce40823j), 2013-01-01
Supplement: c3ce40823j.pdf [file c3ce40823j.pdf]

*Supporting Information for the Manuscript:*

**Entangled Zn(II)/Cd(II) Coordination Complexes Based on a Flexible Bis(methylbenzimidazole) Ligand and Different Dicarboxylates**

**Lu Liu, Chao Huang, Zhengchuang Wang, Dongqing Wu, Hongwei Hou<sup>a</sup>, Yaoting Fan**

<sup>a</sup>The College of Chemistry and Molecular Engineering, Zhengzhou University, Zhengzhou 450052, P. R. China

Author for correspondence: Prof. Hongwei Hou, E-mail: [houhongw@zzu.edu.cn](mailto:houhongw@zzu.edu.cn)

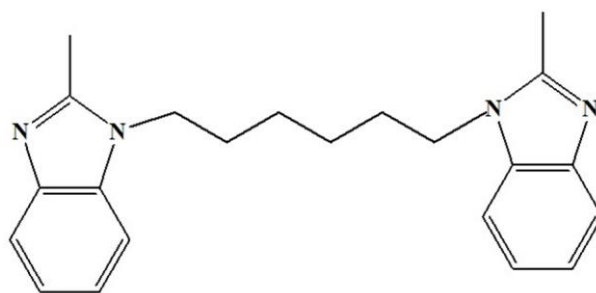

**Hbmb**

**Scheme S1.** The N-heterocyclic ligand adopted in this paper.

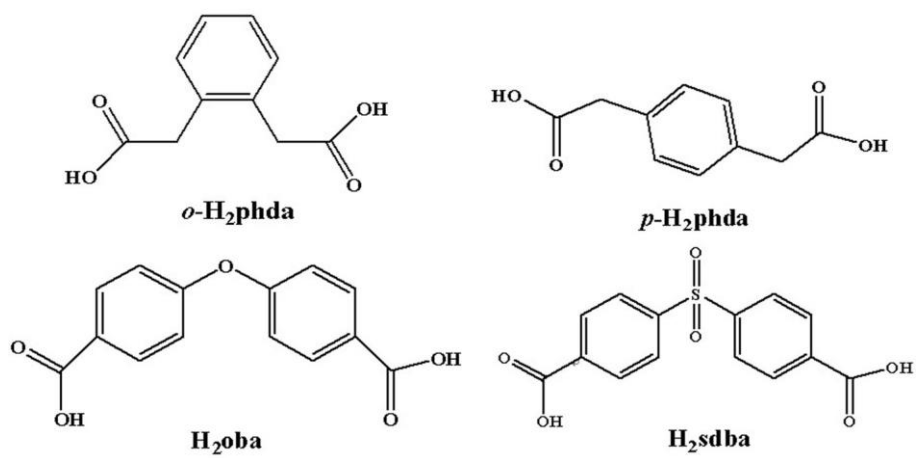

**Scheme S2.** Structures of the carboxylate ligands used in this paper

**Table S1. Crystallographic data and structure refinement details for parts of complexes<sup>a,b</sup> under specific conditions**

| Complex                                  | 1-DMF                                                            | 3-MeCN                                                           | 4-MeCN                                                          | 5-MeOH                                                           | 6-MeOH                                                           |
|------------------------------------------|------------------------------------------------------------------|------------------------------------------------------------------|-----------------------------------------------------------------|------------------------------------------------------------------|------------------------------------------------------------------|
| formula                                  | C <sub>21</sub> H <sub>21</sub> N <sub>2</sub> O <sub>4</sub> Zn | C <sub>32</sub> H <sub>36</sub> N <sub>4</sub> O <sub>5</sub> Zn | C <sub>32</sub> H <sub>36</sub> CdN <sub>4</sub> O <sub>5</sub> | C <sub>25</sub> H <sub>21</sub> N <sub>2</sub> O <sub>5</sub> Zn | C <sub>25</sub> H <sub>21</sub> Cd N <sub>2</sub> O <sub>5</sub> |
| fw                                       | 430.77                                                           | 622.02                                                           | 669.05                                                          | 494.81                                                           | 541.84                                                           |
| T/K                                      | 293(2)                                                           | 293(2)                                                           | 293(2)                                                          | 293(2)                                                           | 293(2)                                                           |
| λ (Mo K), Å                              | 0.71073                                                          | 0.71073                                                          | 0.71073                                                         | 0.71073                                                          | 0.71073                                                          |
| Cryst syst                               | monoclinic                                                       | monoclinic                                                       | monoclinic                                                      | monoclinic                                                       | monoclinic                                                       |
| Space group                              | <i>P2(1)/c</i>                                                   | <i>P 2/c</i>                                                     | <i>P2/c</i>                                                     | <i>P2(1)/c</i>                                                   | <i>P2(1)/c</i>                                                   |
| a (Å)                                    | 10.981(2)                                                        | 9.2122(18)                                                       | 9.0575(18)                                                      | 11.936(2)                                                        | 12.241(2)                                                        |
| b (Å)                                    | 10.867(2)                                                        | 10.310(2)                                                        | 10.338(2)                                                       | 14.277(3)                                                        | 14.012(3)                                                        |
| c (Å)                                    | 16.101(3)                                                        | 17.092(5)                                                        | 17.427(5)                                                       | 13.726(3)                                                        | 14.167(3)                                                        |
| α(°)                                     | 90                                                               | 90                                                               | 90                                                              | 90                                                               | 90                                                               |
| β(°)                                     | 104.41(3)                                                        | 117.59(2)                                                        | 115.35(2)                                                       | 99.86(3)                                                         | 99.53(3)                                                         |
| γ(°)                                     | 90                                                               | 90                                                               | 90                                                              | 90                                                               | 90                                                               |
| V (Å <sup>3</sup> )                      | 1860.7(6)                                                        | 1438.8(6)                                                        | 1474.7(6)                                                       | 2304.6(8)                                                        | 2396.5(8)                                                        |
| Z                                        | 4                                                                | 2                                                                | 2                                                               | 4                                                                | 4                                                                |
| D <sub>calcd</sub> (g·cm <sup>-3</sup> ) | 1.538                                                            | 1.436                                                            | 1.507                                                           | 1.426                                                            | 1.502                                                            |
| Reflections collected /unique            | 22798 / 4462                                                     | 10240 / 2682                                                     | 15114 / 2752                                                    | 28368 / 5503                                                     | 19590 / 5702                                                     |
| R(int)                                   | 0.0443                                                           | 0.0588                                                           | 0.0543                                                          | 0.0485                                                           | 0.0455                                                           |
| abs. coeff/mm <sup>-1</sup>              | 1.351                                                            | 0.902                                                            | 0.788                                                           | 1.104                                                            | 0.948                                                            |
| F(000)                                   | 892                                                              | 652                                                              | 688                                                             | 1020                                                             | 1092                                                             |
| θ (°)                                    | 1.91-27.95                                                       | 2.39-25.50                                                       | 1.97-25.50                                                      | 1.73-27.93                                                       | 2.06-27.92                                                       |
| GOF                                      | 1.066                                                            | 1.164                                                            | 1.132                                                           | 1.006                                                            | 0.991                                                            |
| R <sub>I</sub> (I>2σ(I)) <sup>a</sup>    | 0.0495                                                           | 0.0718                                                           | 0.0514                                                          | 0.0625                                                           | 0.0539                                                           |
| wR <sub>2</sub> (I>2σ(I)) <sup>b</sup>   | 0.1018                                                           | 0.1624                                                           | 0.1109                                                          | 0.1386                                                           | 0.1002                                                           |

$$^a R_1 = \sum ||F_o| - |F_c|| / \sum |F_o|. \quad ^b wR_2 = [\sum w(F_o^2 - F_c^2)^2 / \sum w(F_o^2)^2]^{1/2}.$$

**Notes:**

**1**-DMF is the structure of complex 1 after boiling in DMF;

**3**-MeCN is the structure of complex 3 after boiling in MeCN;

**4**-MeCN is the structure of complex 4 after boiling in MeCN;

**5**-MeOH is the structure of complex 5 after boiling in MeOH;

**6**-MeOH is the structure of complex 6 after boiling in MeOH.

**Table S2. The unit-cell parameters of complexes 1–8 under specific conditions**

|           |                     | H <sub>2</sub> O | MeOH   | EtOH   | MeCN   | DMF    |
|-----------|---------------------|------------------|--------|--------|--------|--------|
| Complex 1 | a (Å)               | 11.00            | 11.04  | 11.00  | 11.01  | 10.99  |
|           | b (Å)               | 10.89            | 10.90  | 10.88  | 10.90  | 10.86  |
|           | c (Å)               | 16.14            | 16.15  | 16.13  | 16.13  | 16.11  |
|           | $\alpha$ (°)        | 90               | 90     | 90     | 90     | 90     |
|           | $\beta$ (°)         | 104.30           | 104.43 | 104.39 | 104.42 | 104.47 |
|           | $\gamma$ (°)        | 90               | 90     | 90     | 90     | 90     |
|           | V (Å <sup>3</sup> ) | 1874             | 1882   | 1869   | 1874   | 1860   |
| Complex 2 | a (Å)               | 11.19            | 11.14  | 11.15  | 11.18  | 11.16  |
|           | b (Å)               | 11.07            | 11.02  | 11.03  | 11.02  | 11.05  |
|           | c (Å)               | 16.31            | 16.22  | 16.23  | 16.26  | 16.28  |
|           | $\alpha$ (°)        | 90               | 90     | 90     | 90     | 90     |
|           | $\beta$ (°)         | 104.88           | 104.92 | 104.88 | 104.77 | 104.78 |
|           | $\gamma$ (°)        | 90               | 90     | 90     | 90     | 90     |
|           | V (Å <sup>3</sup> ) | 1952             | 1924   | 1929   | 1937   | 1940   |
| Complex 3 | a (Å)               | 9.24             | 9.25   | 9.22   | 9.23   | 9.23   |
|           | b (Å)               | 10.30            | 10.35  | 10.34  | 10.32  | 10.27  |
|           | c (Å)               | 15.34            | 15.18  | 15.21  | 15.20  | 15.14  |
|           | $\alpha$ (°)        | 90               | 90     | 90     | 90     | 90     |
|           | $\beta$ (°)         | 95.58            | 94.63  | 94.80  | 94.75  | 94.17  |
|           | $\gamma$ (°)        | 90               | 90     | 90     | 90     | 90     |
|           | V (Å <sup>3</sup> ) | 1452             | 1449   | 1445   | 1443   | 1431   |
| Complex 4 | a (Å)               | 9.07             | 9.08   | 9.08   | 9.06   | 9.04   |
|           | b (Å)               | 10.32            | 10.34  | 10.35  | 10.36  | 10.36  |
|           | c (Å)               | 15.89            | 15.87  | 15.84  | 15.83  | 15.69  |

|           |                     |        |       |       |       |       |
|-----------|---------------------|--------|-------|-------|-------|-------|
|           | $\alpha$ (°)        | 90     | 90    | 90    | 90    | 90    |
|           | $\beta$ (°)         | 95.72  | 95.73 | 95.83 | 95.67 | 95.70 |
|           | $\gamma$ (°)        | 90     | 90    | 90    | 90    | 90    |
|           | V (Å <sup>3</sup> ) | 1480   | 1483  | 1481  | 1479  | 1463  |
| Complex 5 | a (Å)               | 11.94  | 11.94 | 11.97 | 11.92 | 11.97 |
|           | b (Å)               | 14.43  | 14.29 | 14.34 | 14.26 | 14.29 |
|           | c (Å)               | 13.75  | 13.73 | 13.75 | 13.71 | 13.75 |
|           | $\alpha$ (°)        | 90     | 90    | 90    | 90    | 90    |
|           | $\beta$ (°)         | 100.00 | 99.89 | 99.94 | 99.93 | 99.96 |
|           | $\gamma$ (°)        | 90     | 90    | 90    | 90    | 90    |
|           | V (Å <sup>3</sup> ) | 2332   | 2306  | 2324  | 2297  | 2316  |
| Complex 6 | a (Å)               | 12.22  | 12.27 | 12.25 | 12.25 | 12.23 |
|           | b (Å)               | 14.00  | 14.02 | 13.97 | 13.99 | 13.95 |
|           | c (Å)               | 14.15  | 14.21 | 14.17 | 14.20 | 14.14 |
|           | $\alpha$ (°)        | 90     | 90    | 90    | 90    | 90    |
|           | $\beta$ (°)         | 99.44  | 99.48 | 99.61 | 99.47 | 99.58 |
|           | $\gamma$ (°)        | 90     | 90    | 90    | 90    | 90    |
|           | V (Å <sup>3</sup> ) | 2388   | 2411  | 2389  | 2400  | 2379  |
| Complex 7 | a (Å)               | 14.04  | 14.08 | 14.11 | 14.14 | 14.06 |
|           | b (Å)               | 14.89  | 14.90 | 14.95 | 14.91 | 14.93 |
|           | c (Å)               | 16.33  | 16.30 | 16.34 | 16.36 | 16.36 |
|           | $\alpha$ (°)        | 98.01  | 97.94 | 97.83 | 97.89 | 97.88 |
|           | $\beta$ (°)         | 95.16  | 95.27 | 95.32 | 95.37 | 95.21 |
|           | $\gamma$ (°)        | 95.47  | 95.65 | 95.68 | 95.71 | 95.57 |
|           | V (Å <sup>3</sup> ) | 3348   | 3350  | 3379  | 3379  | 3365  |
| Complex 8 | a (Å)               | 19.50  | 19.48 | 19.42 | 19.47 | 19.47 |

|  |                     |        |       |       |       |        |
|--|---------------------|--------|-------|-------|-------|--------|
|  | b (Å)               | 22.02  | 22.02 | 21.93 | 22.00 | 22.04  |
|  | c (Å)               | 16.13  | 16.12 | 16.08 | 16.10 | 16.12  |
|  | $\alpha$ (°)        | 90     | 90    | 90    | 90    | 90     |
|  | $\beta$ (°)         | 100.04 | 99.96 | 99.96 | 99.85 | 100.01 |
|  | $\gamma$ (°)        | 90     | 90    | 90    | 90    | 90     |
|  | V (Å <sup>3</sup> ) | 6819   | 6812  | 6744  | 6796  | 6812   |



**Table S3. Selected Bond Lengths (Å) and Bond Angles (deg) for 1–8<sup>a</sup>**

| <b>Complex 1</b>    |            |                     |            |                     |            |
|---------------------|------------|---------------------|------------|---------------------|------------|
| Zn(1)-N(1)          | 2.021(4)   | Zn(1)-O(2)#1        | 2.055(3)   | Zn(1)-O(1)          | 2.049(3)   |
| Zn(1)-O(3)#2        | 2.070(3)   | Zn(1)-O(4)#3        | 2.077(3)   | N(1)-Zn(1)-O(2)#1   | 104.83(14) |
| N(1)-Zn(1)-O(1)     | 97.04(14)  | O(2)#1-Zn(1)-O(1)   | 158.12(13) | N(1)-Zn(1)-O(3)#2   | 101.04(15) |
| O(2)#1-Zn(1)-O(3)#2 | 86.57(13)  | O(1)-Zn(1)-O(3)#2   | 89.03(13)  | N(1)-Zn(1)-O(4)#3   | 100.84(15) |
| O(2)#1-Zn(1)-O(4)#3 | 88.70(14)  | O(1)-Zn(1)-O(4)#3   | 87.45(13)  | O(3)#2-Zn(1)-O(4)#3 | 158.09(14) |
| <b>Complex 2</b>    |            |                     |            |                     |            |
| O(4)-Cd(1)#5        | 2.267(2)   | Cd(1)-N(1)          | 2.220(2)   | Cd(1)-O(3)#2        | 2.240(2)   |
| Cd(1)-O(1)          | 2.226(2)   | Cd(1)-O(2)#1        | 2.232(2)   | Cd(1)-O(4)#3        | 2.267(2)   |
| N(1)-Cd(1)-O(3)#2   | 101.12(8)  | N(1)-Cd(1)-O(1)     | 106.01(8)  | O(3)#2-Cd(1)-O(4)#3 | 157.88(7)  |
| N(1)-Cd(1)-O(2)#1   | 95.59(8)   | N(1)-Cd(1)-O(4)#3   | 100.87(8)  | O(1)-Cd(1)-O(2)#1   | 158.26(7)  |
| N(1)-Cd(1)-O(4)#3   | 100.87(8)  | O(1)-Cd(1)-O(4)#3   | 85.57(9)   | O(1)-Cd(1)-O(3)#2   | 90.73(9)   |
| O(2)#1-Cd(1)-O(4)#3 | 87.96(9)   |                     |            |                     |            |
| <b>Complex 3</b>    |            |                     |            |                     |            |
| Zn(1)-O(1)#1        | 1.9537(19) | Zn(1)-O(1)          | 1.9537(19) | Zn(1)-N(1)          | 2.046(2)   |
| Zn(1)-N(1)#1        | 2.046(2)   | O(1)#1-Zn(1)-O(1)   | 124.90(11) | O(1)#1-Zn(1)-N(1)   | 103.38(8)  |
| O(1)-Zn(1)-N(1)     | 110.31(8)  | O(1)#1-Zn(1)-N(1)#1 | 110.31(8)  | O(1)-Zn(1)-N(1)#1   | 103.38(8)  |
| N(1)-Zn(1)-N(1)#1   | 102.59(12) |                     |            |                     |            |
| <b>Complex 4</b>    |            |                     |            |                     |            |
| Cd(1)-O(1)          | 2.2420(19) | Cd(1)-O(1)#1        | 2.2420(19) | Cd(1)-N(1)          | 2.271(2)   |
| Cd(1)-N(1)#1        | 2.271(2)   | Cd(1)-O(2)          | 2.5654(19) | Cd(1)-O(2)#1        | 2.5654(19) |
| O(1)-Cd(1)-O(1)#1   | 139.44(10) | O(1)-Cd(1)-N(1)     | 97.14(7)   | O(1)#1-Cd(1)-N(1)   | 109.99(8)  |
| O(1)-Cd(1)-N(1)#1   | 109.99(8)  | O(1)#1-Cd(1)-N(1)#1 | 97.14(7)   | N(1)-Cd(1)-N(1)#1   | 95.50(10)  |
| O(1)-Cd(1)-O(2)     | 53.49(6)   | O(1)#1-Cd(1)-O(2)   | 93.38(7)   | N(1)-Cd(1)-O(2)     | 150.08(7)  |
| N(1)#1-Cd(1)-O(2)   | 99.96(7)   | O(1)-Cd(1)-O(2)#1   | 93.38(7)   | O(1)#1-Cd(1)-O(2)#1 | 53.49(6)   |
| N(1)-Cd(1)-O(2)#1   | 99.96(7)   | N(1)#1-Cd(1)-O(2)#1 | 150.08(7)  | O(2)-Cd(1)-O(2)#1   | 78.73(10)  |
| <b>Complex 5</b>    |            |                     |            |                     |            |
| Zn(1)-O(1)          | 2.021(3)   | Zn(1)-N(1)          | 2.029(3)   | Zn(1)-O(2)          | 2.040(3)   |
| Zn(1)-O(4)          | 2.062(3)   | Zn(1)-O(3)          | 2.083(3)   | O(1)-Zn(1)-N(1)     | 103.77(14) |
| O(1)-Zn(1)-O(2)     | 91.93(14)  | N(1)-Zn(1)-O(2)     | 105.45(14) | O(1)-Zn(1)-O(4)     | 156.39(13) |
| N(1)-Zn(1)-O(4)     | 99.67(14)  | O(2)-Zn(1)-O(4)     | 84.55(13)  | O(1)-Zn(1)-O(3)     | 86.22(14)  |
| N(1)-Zn(1)-O(3)     | 97.85(14)  | O(2)-Zn(1)-O(3)     | 156.37(13) | O(4)-Zn(1)-O(3)     | 87.78(14)  |
| <b>Complex 6</b>    |            |                     |            |                     |            |
| Cd(1)-O(4)          | 2.205(2)   | Cd(1)-N(1)          | 2.217(2)   | Cd(1)-O(1)          | 2.227(2)   |
| Cd(1)-O(2)          | 2.2528(19) | Cd(1)-O(3)          | 2.266(2)   | O(4)-Cd(1)-N(1)     | 103.80(8)  |
| O(4)-Cd(1)-O(1)     | 95.60(9)   | N(1)-Cd(1)-O(1)     | 105.08(9)  | O(4)-Cd(1)-O(2)     | 155.83(8)  |
| N(1)-Cd(1)-O(2)     | 99.91(8)   | O(1)-Cd(1)-O(2)     | 82.65(8)   | O(4)-Cd(1)-O(3)     | 85.27(9)   |

|                     |           |                     |            |                    |          |
|---------------------|-----------|---------------------|------------|--------------------|----------|
| N(1)-Cd(1)-O(3)     | 98.95(10) | O(1)-Cd(1)-O(3)     | 154.97(10) | O(2)-Cd(1)-O(3)    | 86.45(9) |
| <b>Complex 7</b>    |           |                     |            |                    |          |
| Zn(1)-O(5)          | 1.953(5)  | Zn(1)-O(3)          | 1.997(5)   | Zn(1)-N(3)         | 2.038(6) |
| Zn(1)-N(1)          | 2.054(6)  | Zn(2)-O(11)         | 1.965(6)   | Zn(2)-O(9)#1       | 1.968(6) |
| Zn(2)-N(7)#2        | 2.009(6)  | Zn(2)-N(6)#3        | 2.044(6)   | O(5)-Zn(1)-O(3)    | 128.1(2) |
| O(5)-Zn(1)-N(3)     | 98.5(2)   | O(3)-Zn(1)-N(3)     | 112.6(2)   | O(5)-Zn(1)-N(1)    | 101.8(2) |
| O(3)-Zn(1)-N(1)     | 105.0(2)  | N(3)-Zn(1)-N(1)     | 109.6(2)   | O(11)-Zn(2)-O(9)#1 | 105.2(3) |
| O(11)-Zn(2)-N(7)#2  | 106.7(3)  | O(9)#1-Zn(2)-N(7)#2 | 125.9(3)   | O(11)-Zn(2)-N(6)#3 | 98.3(2)  |
| O(9)#1-Zn(2)-N(6)#3 | 105.8(3)  | N(7)#2-Zn(2)-N(6)#3 | 111.3(2)   |                    |          |
| <b>Complex 8</b>    |           |                     |            |                    |          |
| Cd(1)-N(1)          | 2.244(7)  | Cd(1)-N(3)#1        | 2.276(7)   | Cd(1)-O(1)         | 2.304(6) |
| Cd(1)-O(4)#2        | 2.359(7)  | Cd(1)-O(3)#2        | 2.370(7)   | Cd(1)-O(2)         | 2.485(7) |
| N(1)-Cd(1)-N(3)#1   | 106.5(2)  | N(1)-Cd(1)-O(1)     | 98.0(2)    | N(3)#1-Cd(1)-O(1)  | 85.9(2)  |
| N(1)-Cd(1)-O(4)#2   | 153.5(3)  | N(3)#1-Cd(1)-O(4)#2 | 87.0(3)    | O(1)-Cd(1)-O(4)#2  | 105.8(3) |
| N(1)-Cd(1)-O(3)#2   | 99.3(3)   | N(3)#1-Cd(1)-O(3)#2 | 112.6(3)   | O(1)-Cd(1)-O(3)#2  | 149.7(3) |
| O(4)#2-Cd(1)-O(3)#2 | 54.3(2)   | N(1)-Cd(1)-O(2)     | 100.0(2)   | N(3)#1-Cd(1)-O(2)  | 135.1(2) |
| O(1)-Cd(1)-O(2)     | 54.6(2)   | O(4)#2-Cd(1)-O(2)   | 84.9(2)    | O(3)#2-Cd(1)-O(2)  | 97.7(3)  |

<sup>a</sup>Symmetry transformations used to generate equivalent atoms in complex **(1)**: #1  $-x, -y+1, -z+1$ ; #2  $x, -y+1/2, z+1/2$ ; #3  $-x, y+1/2, -z+1/2$ . **(2)**: #1  $-x+1, -y+1, -z+1$ ; #2  $x, -y+1/2, z-1/2$ ; #3  $-x+1, y+1/2, -z+3/2$ ; #5  $-x+1, y-1/2, -z+3/2$ . **(3)** #1  $-x+2, y, -z+3/2$ . **(4)**: #1  $-x, y, -z+1/2$ . **(7)**: #1  $x+1, y-1, z$ ; #2  $-x, -y, -z+1$ ; #3  $-x+1, -y+1, -z+2$ . **(8)**: #1  $x+1/2, -y+1/2, z+1/2$ ; #2  $-x+1/2, y+1/2, -z+1/2$ .

**Table S4.** Selected Bond Lengths (Å) and Bond Angles (deg) for parts of complexes<sup>a</sup> under specific conditions

| Complex 1-DMF       |            |                     |            |                     |            |
|---------------------|------------|---------------------|------------|---------------------|------------|
| Zn(1)-N(1)          | 2.027(2)   | Zn(1)-O(2)#1        | 2.047(2)   | Zn(1)-O(1)          | 2.054(2)   |
| Zn(1)-O(3)#3        | 2.062(2)   | Zn(1)-O(4)#2        | 2.066(2)   | N(1)-Zn(1)-O(2)#1   | 97.33 (9)  |
| N(1)-Zn(1)-O(1)     | 104.52(9)  | O(2)#1-Zn(1)-O(1)   | 158.14(8)  | N(1)-Zn(1)-O(3)#3   | 100.88(9)  |
| O(2)#1-Zn(1)-O(3)#3 | 87.17(9)   | O(1)-Zn(1)-O(3)#3   | 88.94(9)   | N(1)-Zn(1)-O(4)#2   | 101.00(9)  |
| O(2)#1-Zn(1)-O(4)#2 | 88.96(9)   | O(1)-Zn(1)-O(4)#2   | 86.66(9)   | O(3)#3-Zn(1)-O(4)#2 | 158.09(8)  |
| Complex 3-MeCN      |            |                     |            |                     |            |
| Zn(1)-O(1)#1        | 1.9514(18) | Zn(1)-O(1)          | 1.9514(18) | Zn(1)-N(1)          | 2.051(2)   |
| Zn(1)-N(1)#1        | 2.051(2)   | O(1)#1-Zn(1)-O(1)   | 124.34(11) | O(1)#1-Zn(1)-N(1)   | 102.62(8)  |
| O(1)-Zn(1)-N(1)     | 111.52(7)  | O(1)#1-Zn(1)-N(1)#1 | 111.52(7)  | O(1)-Zn(1)-N(1)#1   | 102.62(8)  |
| N(1)-Zn(1)-N(1)#1   | 102.36(12) |                     |            |                     |            |
| Complex 4-MeCN      |            |                     |            |                     |            |
| Cd(1)-O(1)          | 2.243(3)   | Cd(1)-O(1)#1        | 2.243(3)   | Cd(1)-N(1)          | 2.280(3)   |
| Cd(1)-N(1)#1        | 2.280(3)   | Cd(1)-O(2)          | 2.557(3)   | Cd(1)-O(2)#1        | 2.557(3)   |
| O(1)-Cd(1)-O(1)#1   | 138.29(18) | O(1)-Cd(1)-N(1)     | 111.01(13) | O(1)#1-Cd(1)-N(1)   | 96.95(12)  |
| O(1)-Cd(1)-N(1)#1   | 96.95(12)  | O(1)#1-Cd(1)-N(1)#1 | 111.01(13) | N(1)#1-Cd(1)-N(1)   | 95.32(17)  |
| O(1)-Cd(1)-O(2)     | 53.57(11)  | O(1)#1-Cd(1)-O(2)   | 92.93(12)  | N(1)-Cd(1)-O(2)     | 99.12(12)  |
| N(1)#1-Cd(1)-O(2)   | 150.26(12) | O(1)-Cd(1)-O(2)#1   | 92.93(12)  | O(1)#1-Cd(1)-O(2)#1 | 53.57(11)  |
| N(1)-Cd(1)-O(2)#1   | 150.26(12) | N(1)#1-Cd(1)-O(2)#1 | 99.12(12)  | O(2)-Cd(1)-O(2)#1   | 80.67(17)  |
| Complex 5-MeOH      |            |                     |            |                     |            |
| Zn(1)-O(1)#2        | 2.064(3)   | Zn(1)-N(1)          | 2.029(3)   | Zn(1)-O(2)          | 2.026(3)   |
| Zn(1)-O(4)#3        | 2.075(3)   | Zn(1)-O(5)#1        | 2.036(3)   | O(2)-Zn(1)-N(1)     | 103.49(12) |
| O(1)#2-Zn(1)-O(2)   | 156.45(11) | N(1)-Zn(1)-O(5)#1   | 105.30(12) | O(1)#2-Zn(1)-O(4)#3 | 88.03(12)  |
| N(1)-Zn(1)-O(4)#3   | 97.96(12)  | O(2)-Zn(1)-O(4)#3   | 86.27(12)  | O(5)#1-Zn(1)-O(4)#3 | 156.42(12) |
| N(1)-Zn(1)-O(1)#2   | 99.93(12)  | O(2)-Zn(1)-O(5)#1   | 91.97(11)  | O(5)#1-Zn(1)-O(1)#2 | 84.24(11)  |
| Complex 6-MeOH      |            |                     |            |                     |            |
| Cd(1)-O(4)#3        | 2.271(3)   | Cd(1)-N(1)          | 2.222(3)   | Cd(1)-O(1)#1        | 2.203(3)   |
| Cd(1)-O(2)          | 2.252 (3)  | Cd(1)-O(5)#2        | 2.229(3)   | O(1)#1-Cd(1)-N(1)   | 103.67(13) |
| O(1)#1-Cd(1)-O(5)#2 | 95.54(13)  | N(1)-Cd(1)-O(5)#2   | 105.20(14) | O(1)#1-Cd(1)-O(2)   | 155.85(12) |
| N(1)-Cd(1)-O(2)     | 100.03(13) | O(5)#2-Cd(1)-O(2)   | 82.56(12)  | O(1)#1-Cd(1)-O(4)#3 | 85.24(13)  |
| N(1)-Cd(1)-O(4)#3   | 99.05(14)  | O(5)#2-Cd(1)-O(4)#3 | 154.77(14) | O(2)-Cd(1)-O(4)#3   | 86.55(13)  |

<sup>a</sup> Symmetry transformations used to generate equivalent atoms in complex (1): #1 -x+2,-y,-z+2 ; #2 -x+2,y+1/2,-z+3/2 ; #3 x,-y-1/2,z+1/2. (3): #1 -x,y,-z+1/2. (4): #1 -x+1,y,-z+1/2. (5): #1 x-1,-y+1/2,z-1/2 ; #2 -x+1,-y,-z+1 ; #3 -x+2,y-1/2,-z+3/2. (6): #1 -x+1,-y,-z+1 ; #2 -x,y-1/2,-z+1/2 ; #3 x+1,-y+1/2,z+1/2.

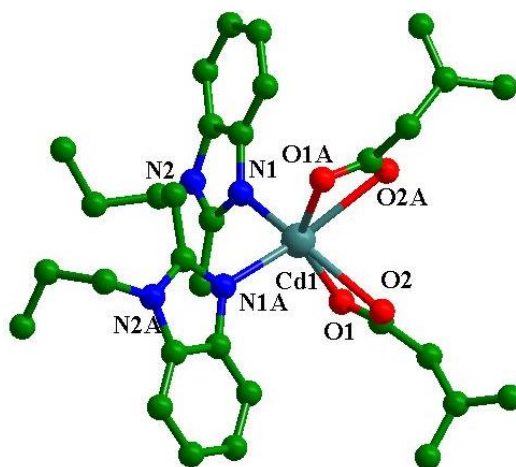

**Figure. S1.** Coordination environment of Cd(II) ion in **4** with hydrogen atoms omitted for clarity.

Symmetry code: A = -x, y, 0.5 - z.

**XRD Patterns.** To confirm the phase purity of these polymers, the PXRD patterns were recorded for complexes **1–8**, and they were comparable to the corresponding simulated ones calculated from the single-crystal diffraction data (Figure. S2, Supporting Information), indicating a pure phase of each bulky sample.

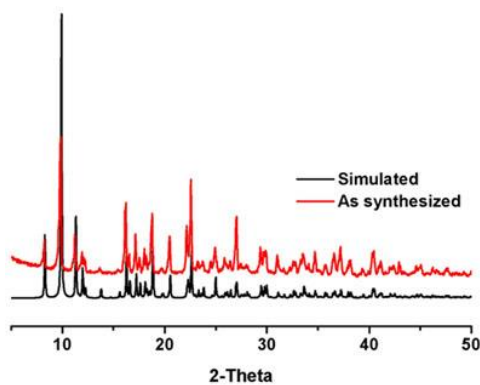

Complex 1

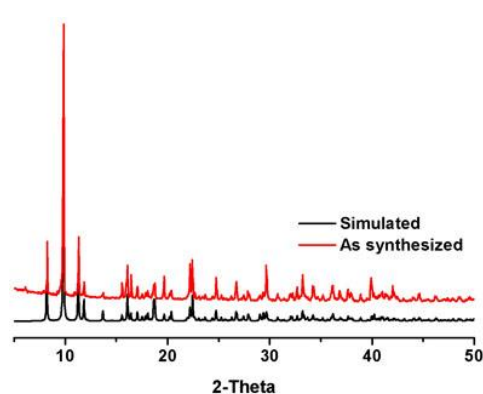

Complex 2

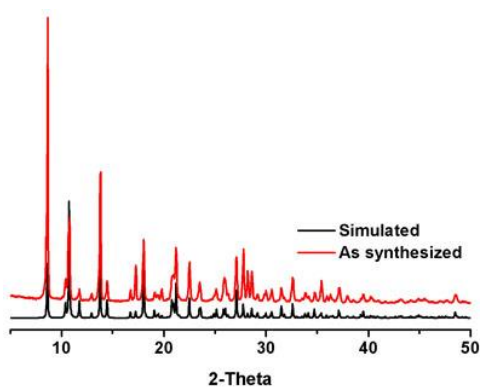

Complex 3

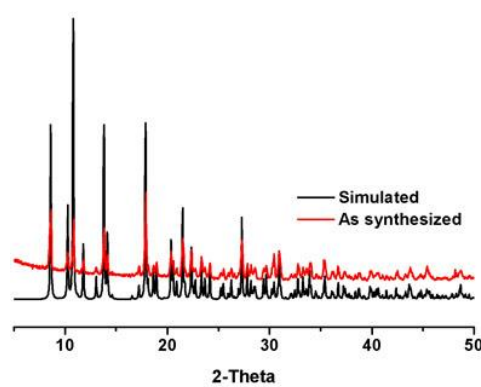

Complex 4

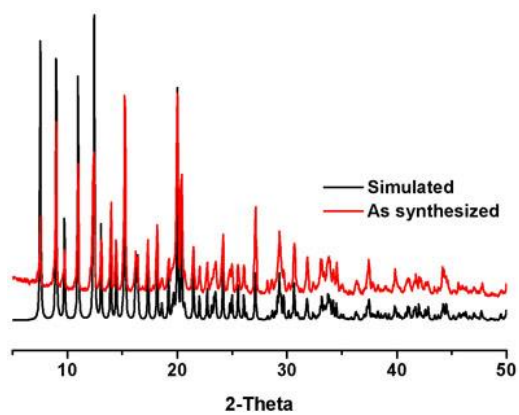

Complex 5

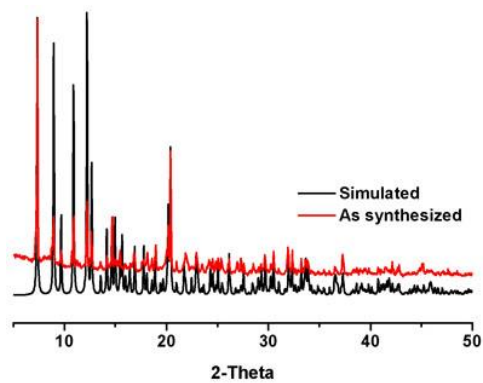

Complex 6

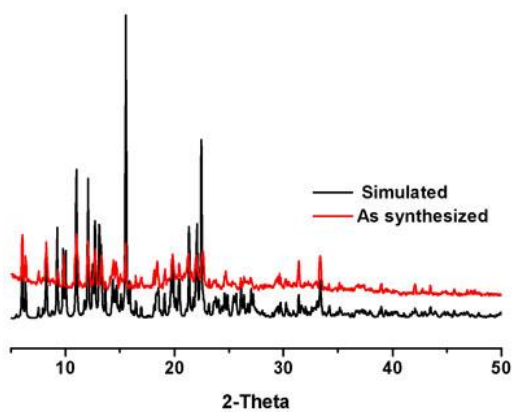

Complex 7

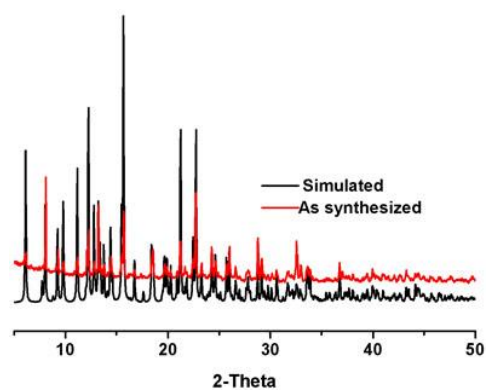

Complex 8

**Figure. S2.** Experimental (red) and simulated (black) PXRD patterns of 1–8.

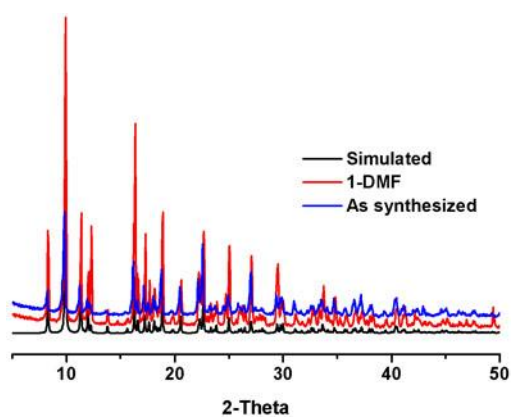

Complex 1-DMF

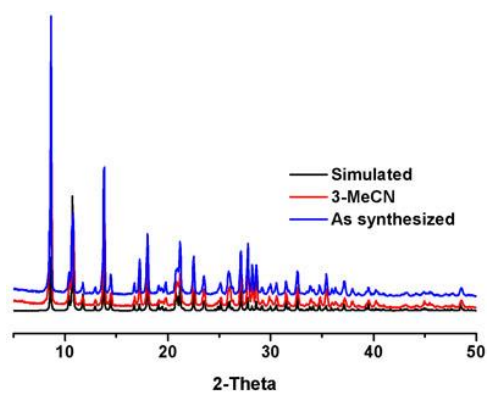

Complex 3-MeCN

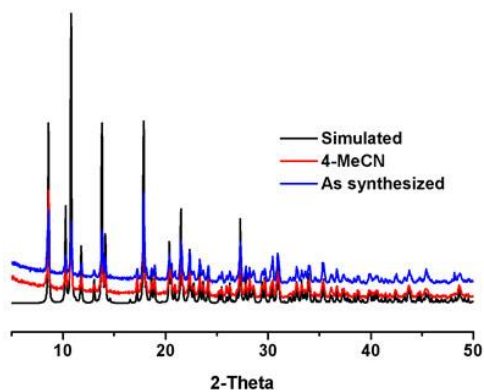

Complex 4-MeCN

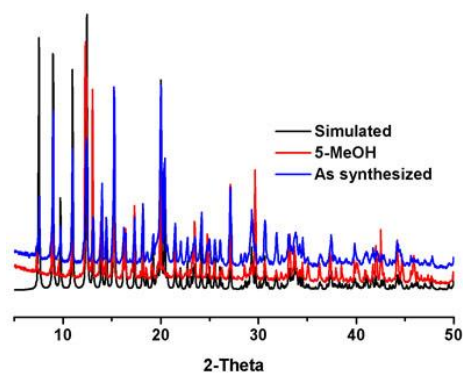

Complex 5-MeOH

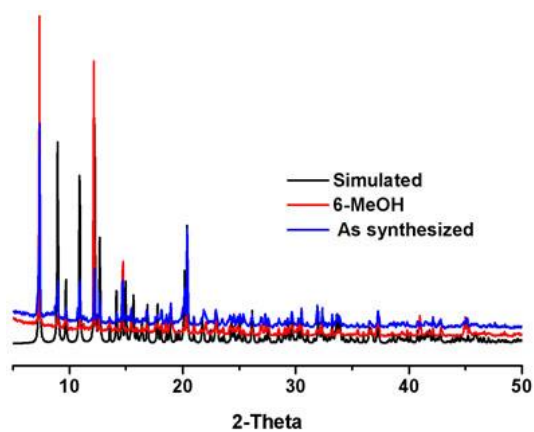

Complex 6-MeOH

**Figure. S3.** Experimental (blue), simulated (black) and refluxed (red) PXRD patterns of parts of complexes under specific conditions.

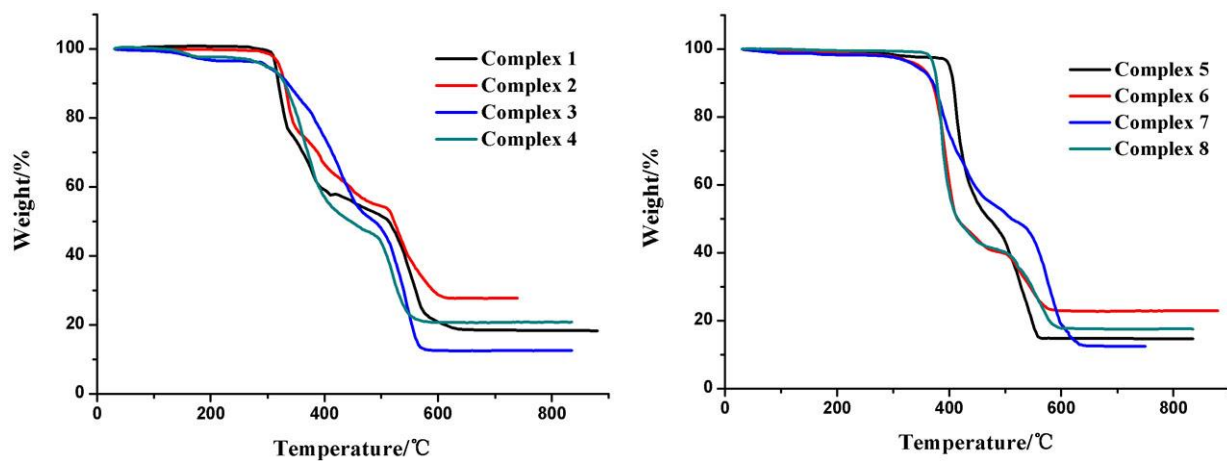

**Figure. S4** Thermogravimetric curve of complexes 1–8.



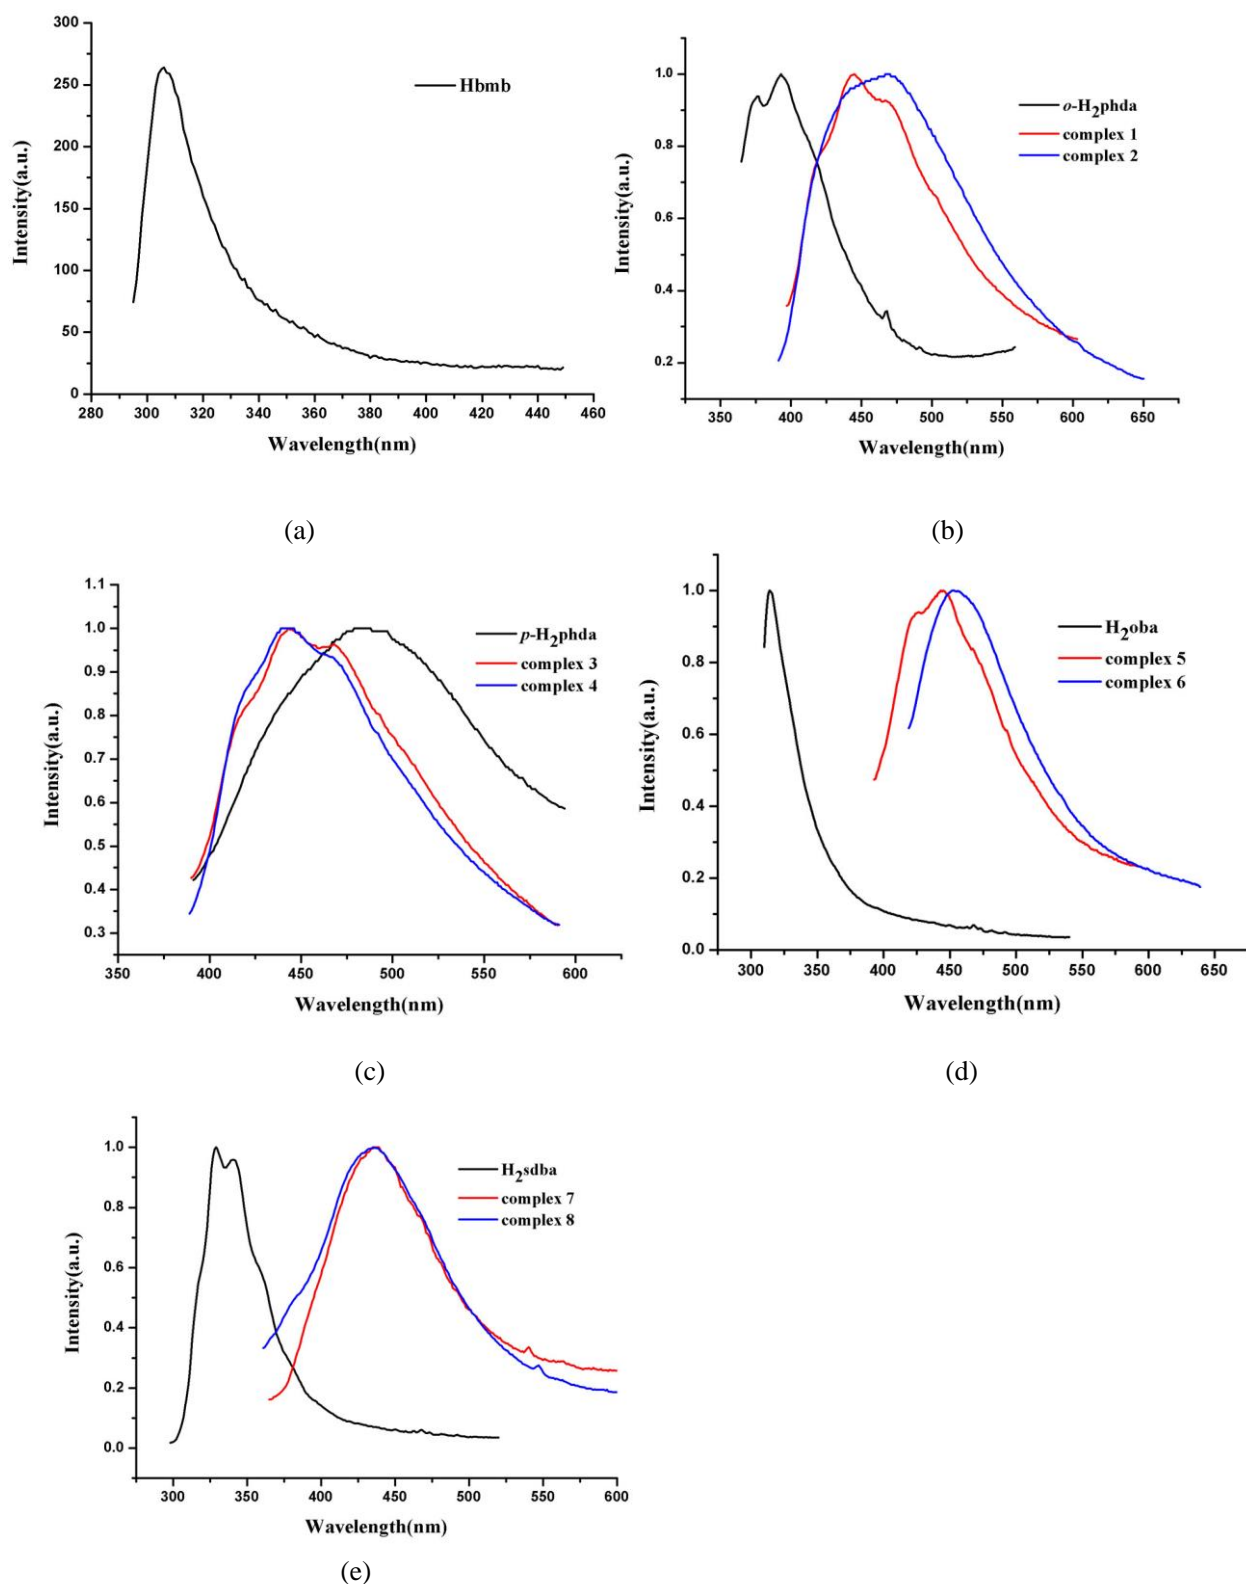

**Figure. S5.** (a) Solid-state emission spectra of the ligand hbmb. (b) Solid-state emission spectra of *o*-H<sub>2</sub>phda, complex 1 and complex 2. (c) Solid-state emission spectra of *p*-H<sub>2</sub>phda, complex 3 and complex 4. (d) Solid-state emission spectra of H<sub>2</sub>oba, complex 5 and complex 6. (e) Solid-state emission spectra of H<sub>2</sub>sdba, complex 7 and complex 8.
